# Supplementary material
Source: Springer Nature journal article supplement (https://www.springermedizin.de/resource/supplementary/12883_2014_1042_MOESM1_ESM.pdf/9456400)

Figure 1

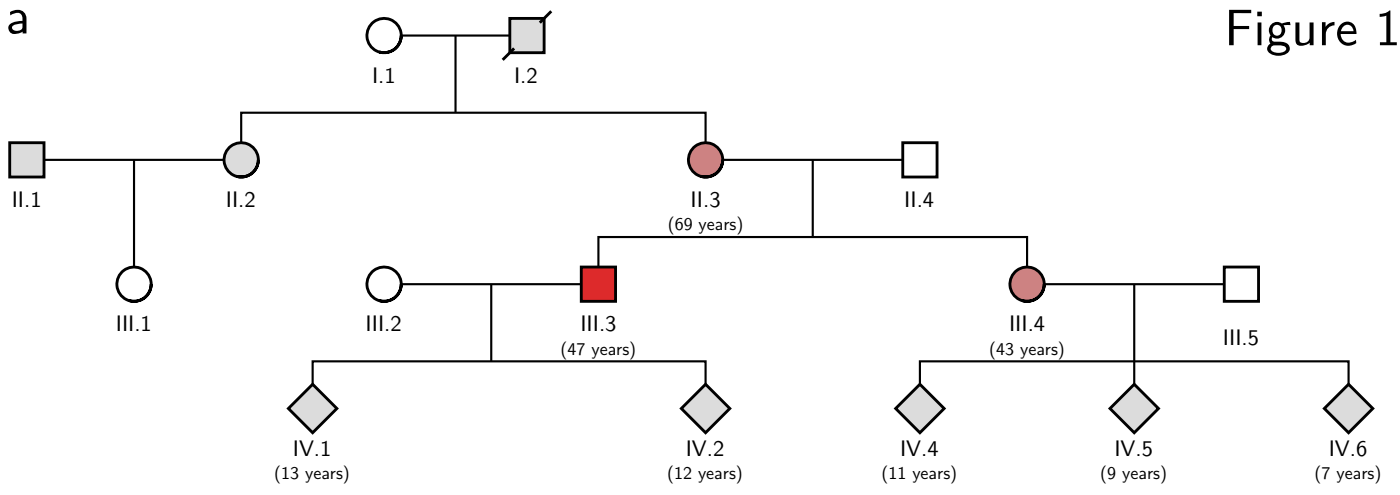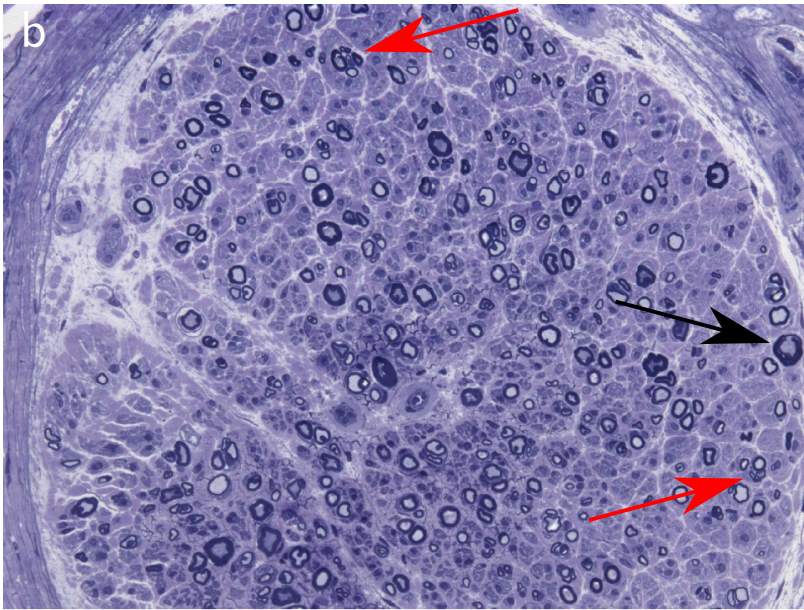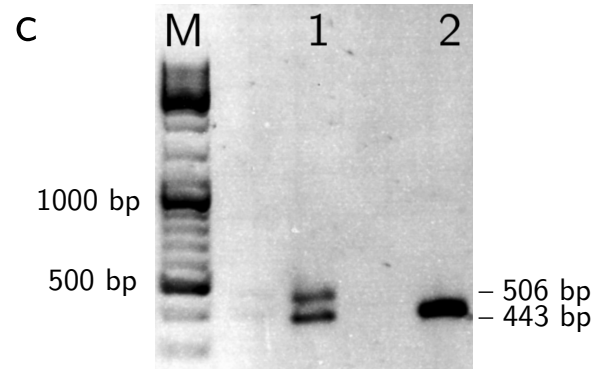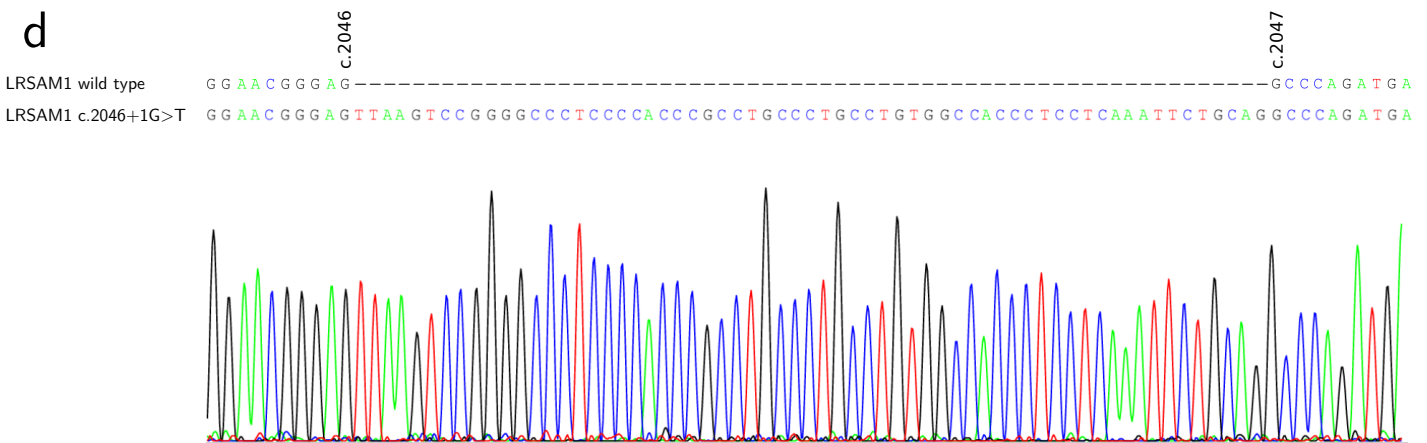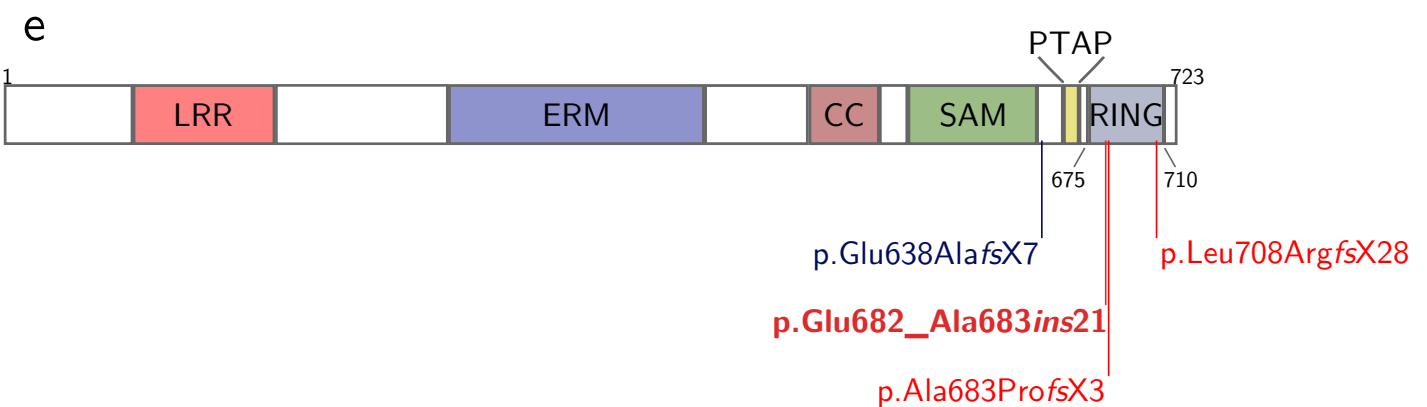

Supplement: MOESM1 [file 9456400]
